# Supplementary material for: Transcriptional reprogramming and phenotypic switching associated with the adaptation of Lactobacillus plantarum C2 to plant niches
Source: PubMed Central journal article supplement (PMC4895336; doi:10.1038/srep27392), 2016-06-07
Supplement: srep27392-s1.pdf [file srep27392-s1.pdf]

1 **Transcriptional reprogramming and phenotypic switching associated with the**  
2 **adaptation of *Lactobacillus plantarum* C2 to plant niches**

3  
4 **Pasquale Filannino<sup>a</sup>, Raffaella Di Cagno<sup>a\*</sup>, Carmine Crecchio<sup>a</sup>, Caterina De Virgilio<sup>b</sup>, Maria**  
5 **De Angelis<sup>a</sup>, Marco Gobbetti<sup>a</sup>**

6  
7 <sup>a</sup>Department of Plant, Soil and Food Sciences, University of Bari A. Moro, Via Amendola 165/a,  
8 70126 Bari, Italy

9 <sup>b</sup>Department of Biosciences, Biotechnologies and Biopharmaceutics, University of Bari, Via  
10 Orabona, 4, 70126 Bari, Italy

11  
12  
13  
14 **Table of Contents:**

- 15 - Supplementary Figures S1-S8  
16 - Supplementary Tables S1- S6

17  
18  
19  
20  
21

22 **Figure S1.** Experimental design and flowchart.

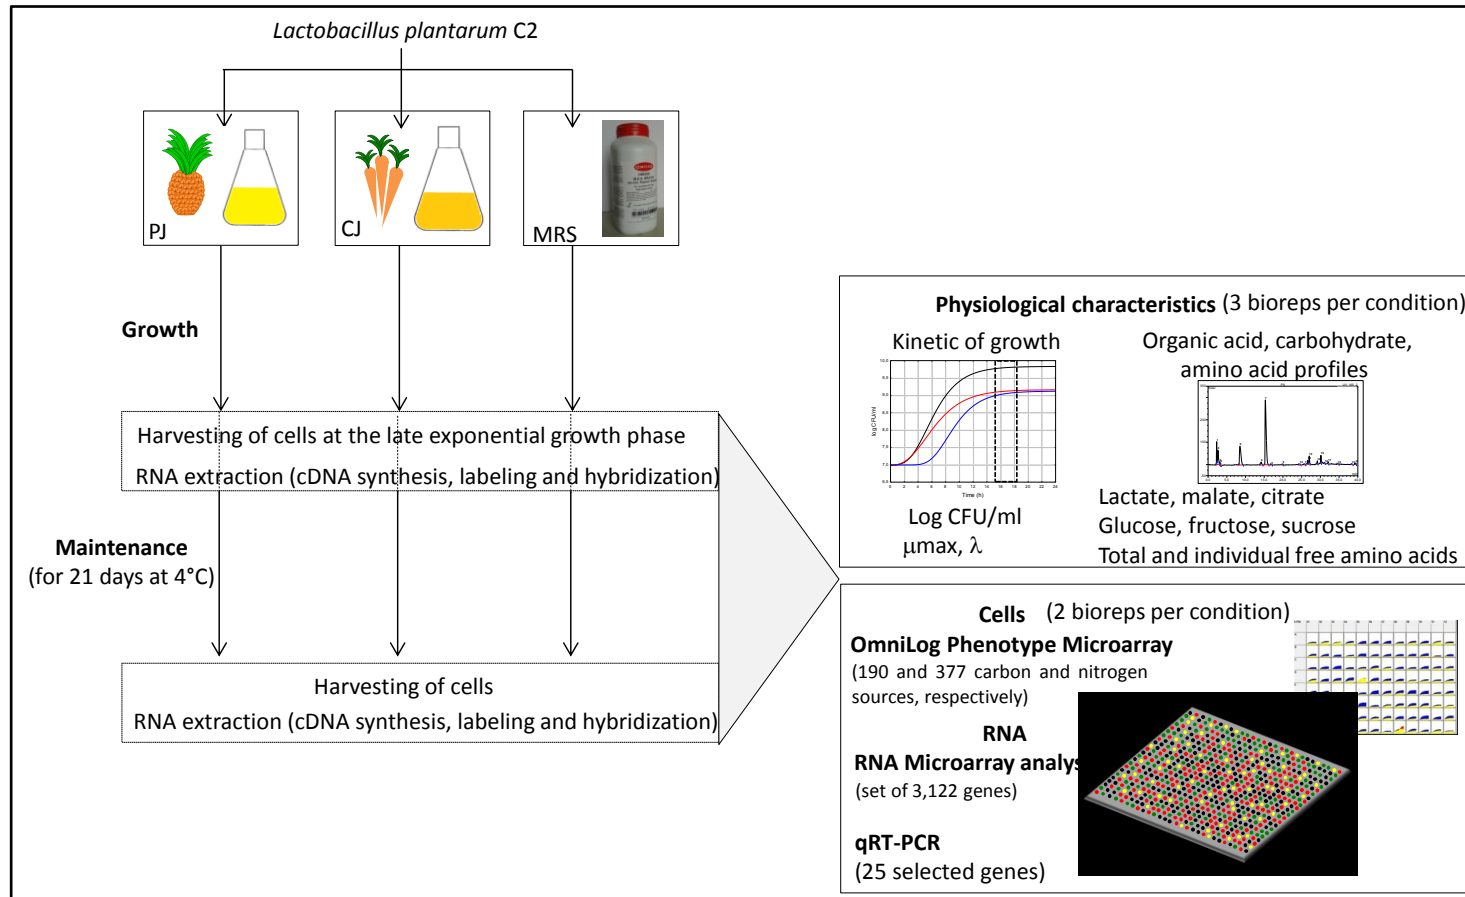

23

24 *Lactobacillus plantarum* C2 was cultivated in carrot and pineapple juice, chosen as model systems representative of vegetables and fruits, respectively.

25 Samples derived from the late exponential growth phase and maintenance were assessed at the molecular level through genome-wide transcriptome

26 analysis, and the phenotypic microarray and physiological characteristics were determined in parallel.

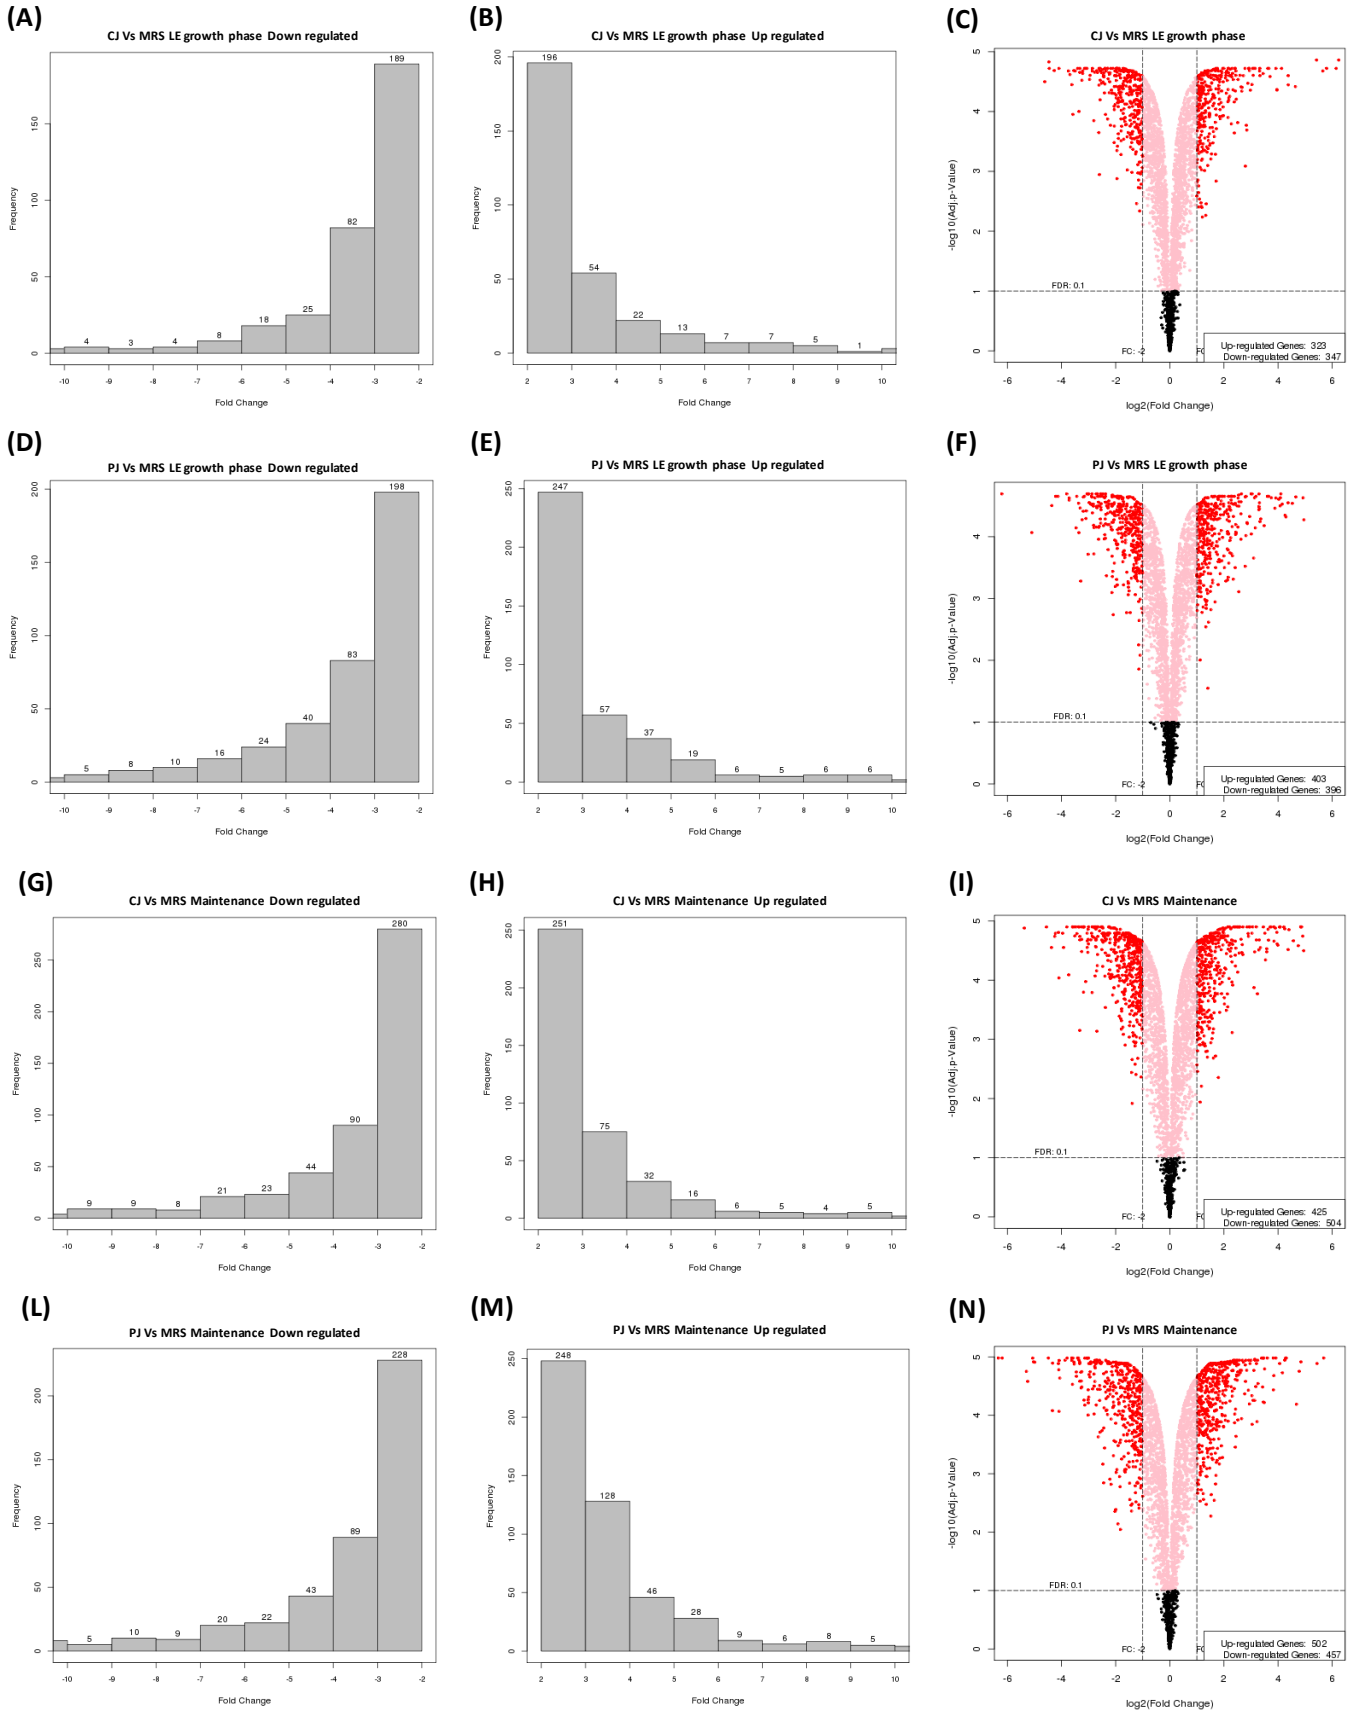

29 Histograms showing fold-change ratios and frequencies of up-regulated and down-regulated genes  
30 during the late exponential (LE) growth phase (16 or 18 h at 30°C) (A, B, D, and E) and the  
31 maintenance period (21 days at 4°C) (G, H, L, and M) in carrot (CJ) and pineapple (PJ) juices  
32 compared to MRS medium. Volcano plots showing gene expression in *L. plantarum* C2 during the  
33 LE growth phase (C and F) and the maintenance period (I and N) in CJ and PJ compared to MRS  
34 medium. The x-axis represents the differential gene expression profiles plotted as fold-induction  
35 ratios on a log-2 scale. The y-axis indicates the statistical significance of the differences in  
36 expression (p-value as calculated by ANOVA) on a log<sub>10</sub> scale.

37

38

39

40

41

42

43

44

45

46

47

48

49

50

51

52

53

54



57 Integrated pathways of *Lactobacillus plantarum* C2 during the late exponential growth phase (16 h at 30°C) in carrot juice (CJ) compared to MRS  
58 medium. A screenshot of the DAVID pathway analysis of the set of differentially expressed genes is shown. The nodes for genes encoding enzymes  
59 are coloured lime green if up-regulated and red if down-regulated. Other enzyme nodes appear in pale green. Substrate nodes appear in white. Multiple  
60 up/down-regulated genes are separated by semicolons. Analytical modules are provided in Dataset S4.

61

62

63

64

65

66

67

68

69

70

71

72

73

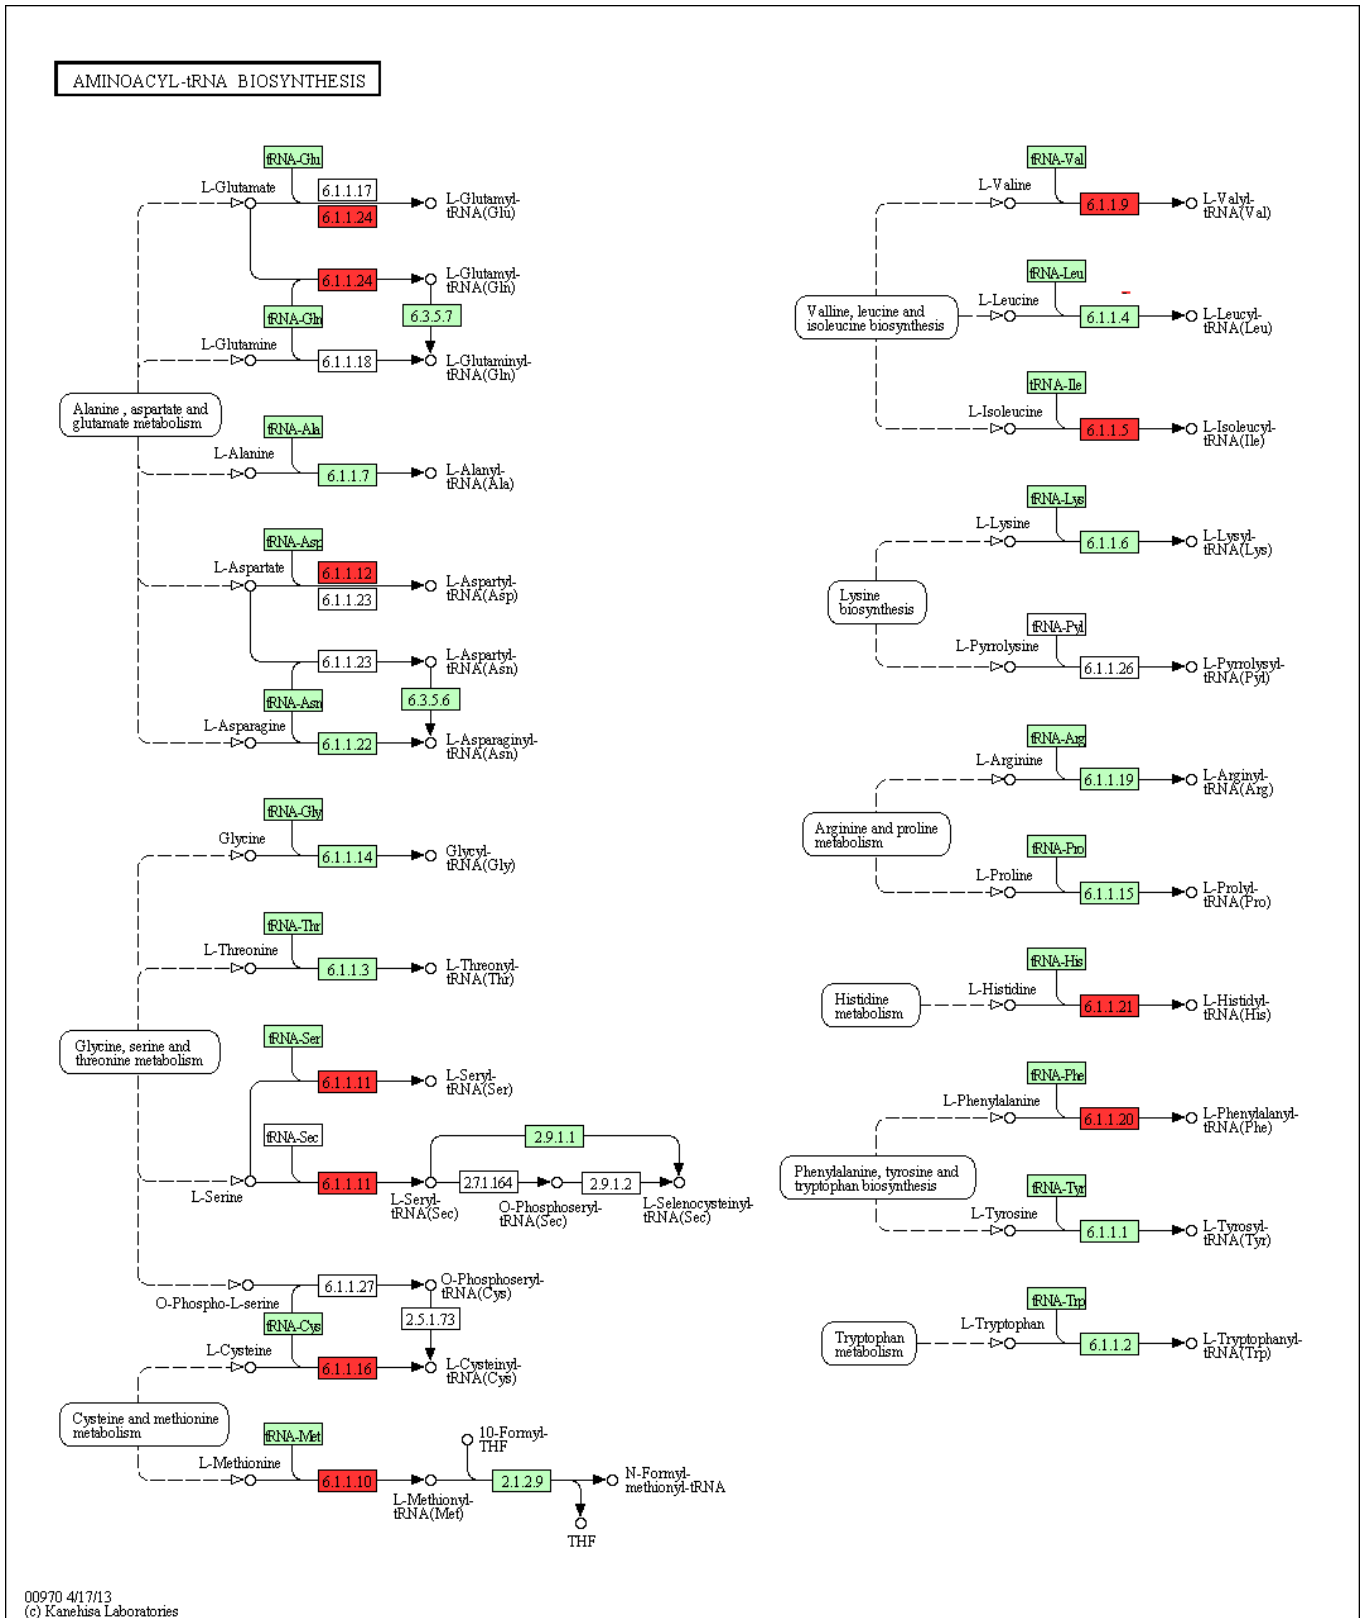

76 The aminoacyl-tRNA biosynthesis pathway in *Lactobacillus plantarum* C2 during the late  
77 exponential growth phase in carrot juice (CJ) compared to MRS medium. A screenshot of the  
78 DAVID pathway analysis of the set of differentially expressed genes is shown. The nodes for genes  
79 encoding enzymes are coloured lime green if up-regulated and red if down-regulated. Other enzyme  
80 nodes appear in pale green. Substrate nodes appear in white. Analytical modules are provided in  
81 Dataset S4.

82

83

84

85

86

87

88

89

90

91

92

93

94

95

96

97

98

99

100

101





104 Integrated pathways of *Lactobacillus plantarum* C2 during maintenance (21 days at 4°C) in carrot juice (CJ) compared to MRS medium. A screenshot  
105 of the DAVID pathway analysis of the set of differentially expressed genes is shown. The nodes for genes encoding enzymes are coloured lime green if  
106 up-regulated and red if down-regulated. Other enzyme nodes appear in pale green. Substrate nodes appear in white. Multiple up/down-regulated genes  
107 are separated by semicolons. Analytical modules are provided in Dataset S4.

108

109

110

111

112

113

114

115

116

117

118

119

120

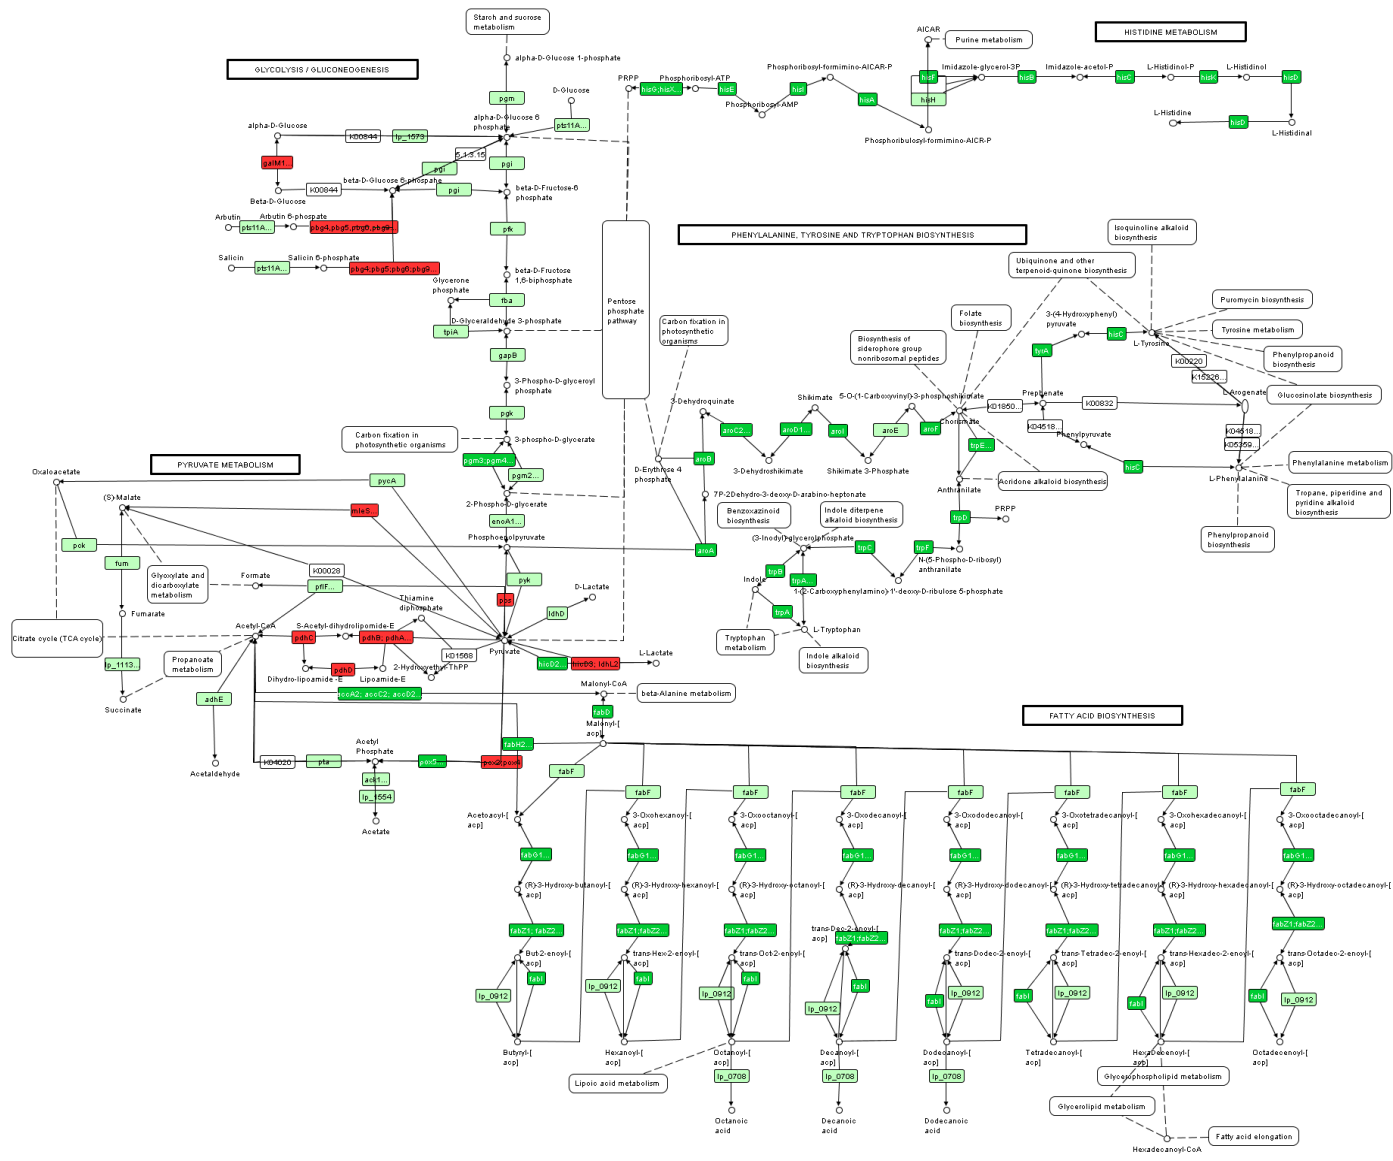

123 Integrated pathways of *Lactobacillus plantarum* C2 during the late exponential growth phase (18 h at 30°C) in pineapple juice (PJ) compared to MRS  
124 medium. A screenshot of the DAVID pathway analysis of the set of differentially expressed genes is shown. The nodes for genes encoding enzymes  
125 are coloured lime green if up-regulated and red if down-regulated. Other enzyme nodes appear in pale green. Substrate nodes appear in white. Multiple  
126 up- or down-regulated genes are separated by semicolons. Analytical modules are provided in Dataset S4.

127

128

129

130

131

132

133

134

135

136

137

138

139

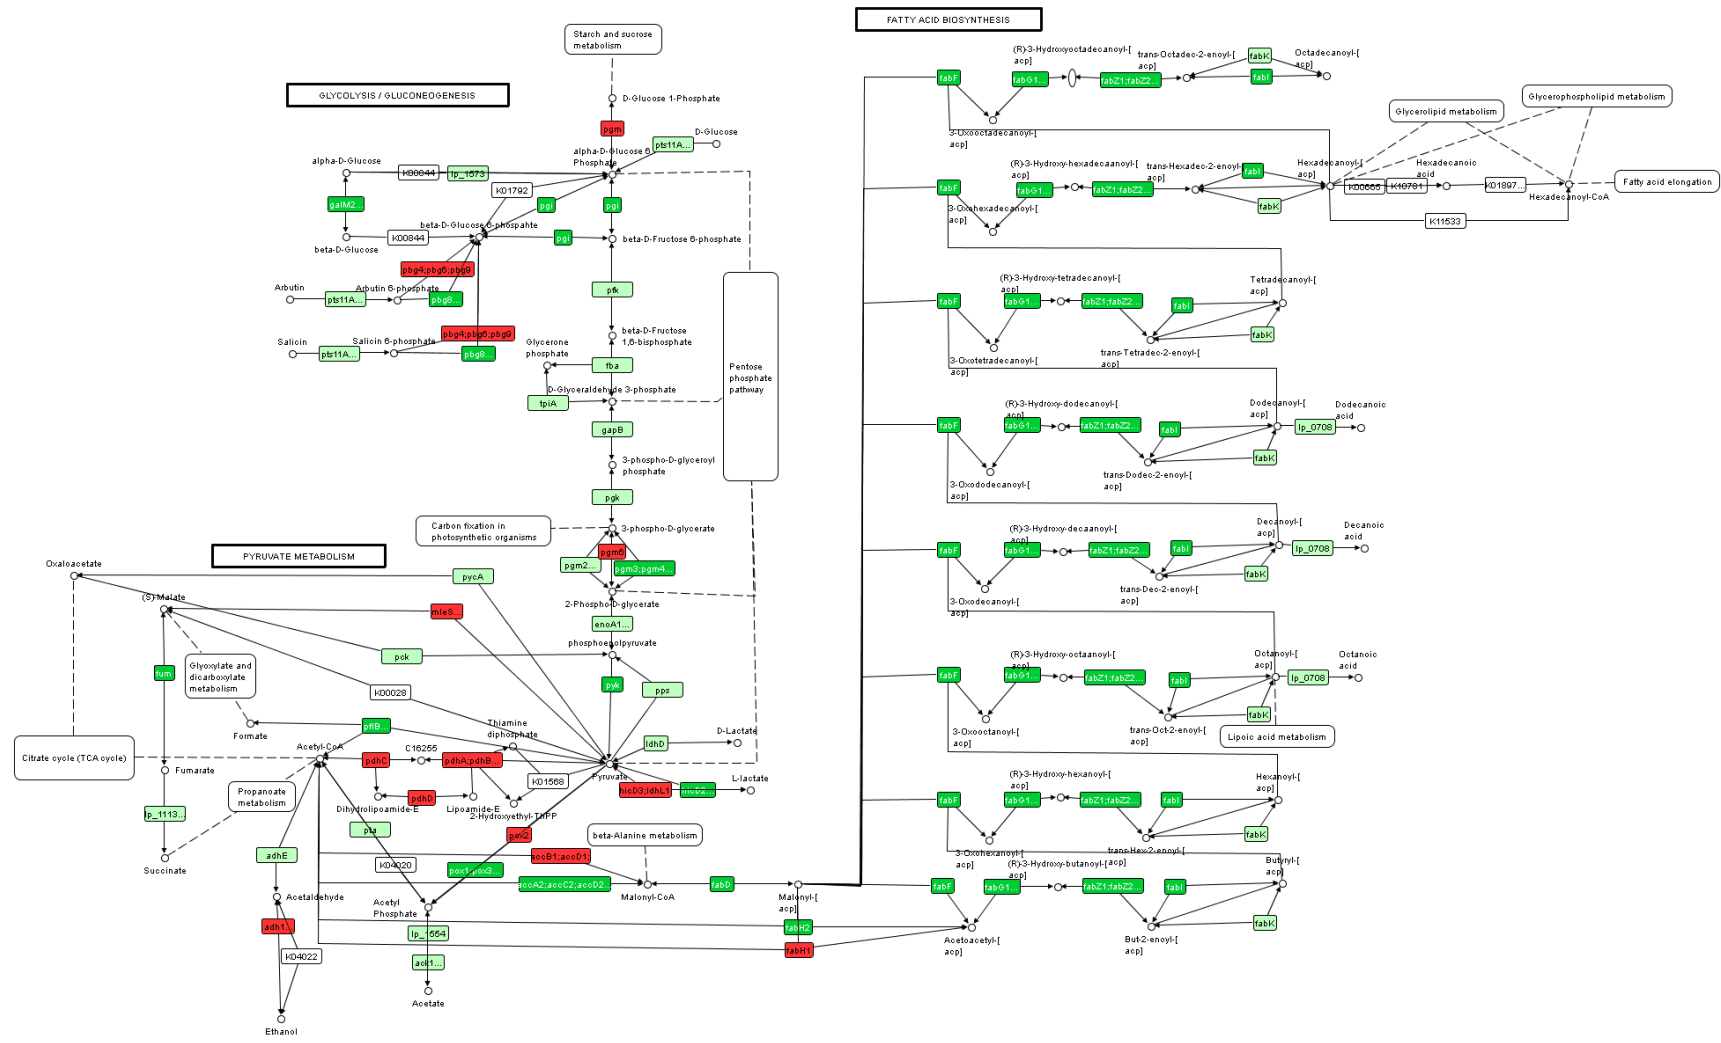

142 Integrated pathways of *Lactobacillus plantarum* C2 during the maintenance period (21 days at 4°C) in pineapple juice (PJ) compared to MRS medium.  
143 A screenshot of DAVID pathway analysis of the set of differentially expressed genes is shown. The nodes for genes encoding enzymes are coloured  
144 lime green if up-regulated and red if down-regulated. Other enzyme nodes appear in pale green. Substrate nodes appear in white. Multiple up- or down-  
145 regulated genes are separated by semicolons. Analytical modules are provided in Dataset S4.

146

147

148

149

150

151

152

153

154

155

156

157

158

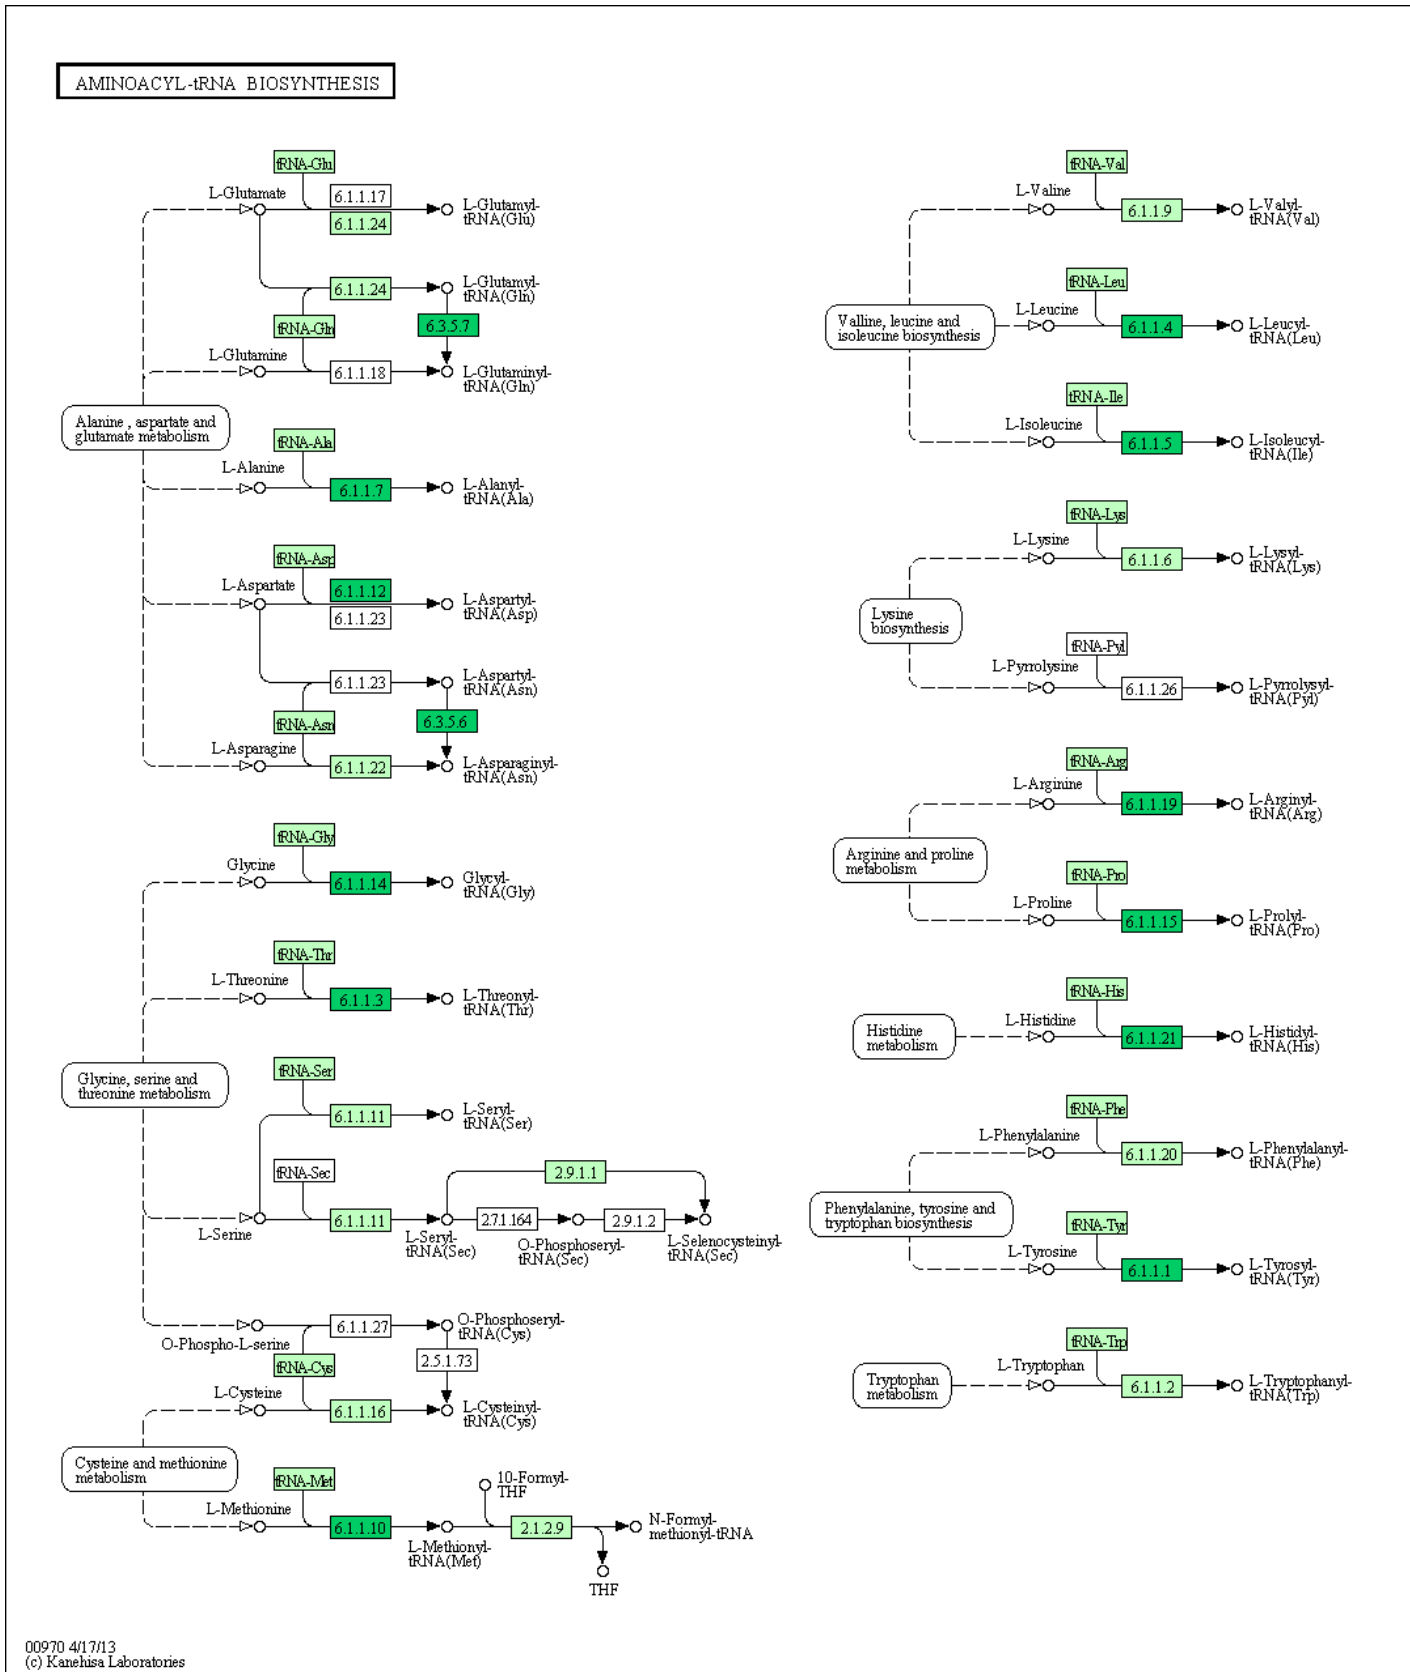

160

161 The aminoacyl-tRNA biosynthesis pathway in *Lactobacillus plantarum* C2 during the maintenance  
 162 period (21 days at 4°C) in pineapple juice (PJ) compared to MRS medium. A screenshot of DAVID

163 pathway analysis of the set of differentially expressed genes is shown. The nodes for genes  
164 encoding enzymes are coloured lime green if up-regulated and red if down-regulated. Other enzyme  
165 nodes appear in pale green. Substrate nodes appear in white. Analytical modules are provided in  
166 Dataset S4.



167 **Table S1.** Phage- and prophage-related genes differentially expressed during the late exponential (LE) growth phase (16 or 18 h at 30°C) and the  
 168 maintenance period (21 days at 4°C) in carrot (CJ) or pineapple (PJ) juices compared to MRS medium.

| <b>Carrot juice (CJ)</b> |             |                                            |                                                                                   |                  |
|--------------------------|-------------|--------------------------------------------|-----------------------------------------------------------------------------------|------------------|
|                          | <b>Gene</b> | <b>Fold Change</b>                         | <b>Description</b>                                                                | <b>Accession</b> |
| <b>LE growth phase</b>   | lp_0915     | 4.82                                       | phage protein                                                                     | NC_004567.2      |
|                          | lp_2397     | 2.08                                       | prophage P2a protein 59; extracellular polysaccharide deacetylase, lipid-anchored | NC_004567.2      |
|                          | lp_2417     | 2.55                                       | prophage P2a protein 40; major capsid protein                                     | NC_004567.2      |
|                          | lp_0681     | -11.94                                     | prophage P1 protein 58, lysin                                                     | NC_004567.2      |
|                          | lp_2437     | -2.74                                      | prophage P2a protein 20, replication protein DnaD domain                          | NC_004567.2      |
|                          | lp_0661     | -3.29                                      | prophage P1 protein 38, terminase large subunit TerL                              | NC_004567.2      |
|                          | lp_2436     | -3.35                                      | prophage P2a protein 21                                                           | NC_004567.2      |
|                          | lp_0644     | -3.46                                      | prophage P1 protein 21                                                            | NC_004567.2      |
|                          | lp_2466     | -2.09                                      | prophage P2b protein 15, terminase large subunit                                  | NC_004567.2      |
|                          | lp_2426     | -2.67                                      | prophage P2a protein 31; phage ArpU family transcriptional regulator              | NC_004567.2      |
|                          | lp_0682     | -21.87                                     | prophage P1 protein 59                                                            | NC_004567.2      |
|                          | lp_2445     | -2.73                                      | prophage P2a protein 12                                                           | NC_004567.2      |
|                          | lp_2457     | -2.32                                      | prophage P2b protein 24                                                           | NC_004567.2      |
|                          | lp_0656     | -3.29                                      | prophage P1 protein 33, phage ArpU family transcriptional regulator               | NC_004567.2      |
|                          | lp_2400     | -2.19                                      | prophage P2a protein 57                                                           | NC_004567.2      |
|                          | lp_2399     | -5.57                                      | prophage P2a protein 58, holin                                                    | NC_004567.2      |
| lp_0663                  | -2.06       | prophage P1 protein 40, minor head protein | NC_004567.2                                                                       |                  |
| lp_2446                  | -3.24       | prophage P2a protein 11                    | NC_004567.2                                                                       |                  |
| <b>Maintenance</b>       | lp_2397     | 12.55                                      | prophage P2a protein 59; extracellular polysaccharide deacetylase, lipid-anchored | NC_004567.2      |
|                          | lp_2415     | 2.04                                       | prophage P2a protein 42                                                           | NC_004567.2      |
|                          | lp_2417     | 3.23                                       | prophage P2a protein 40; major capsid protein                                     | NC_004567.2      |
|                          | lp_2428     | 2.85                                       | prophage P2a protein 29                                                           | NC_004567.2      |
|                          | lp_2432     | 2.40                                       | prophage P2a protein 25                                                           | NC_004567.2      |
|                          | lp_2433     | 3.21                                       | prophage P2a protein 24; endodeoxyribonuclease RusA-like                          | NC_004567.2      |
|                          | lp_2437     | 3.55                                       | prophage P2a protein 20, replication protein DnaD domain                          | NC_004567.2      |

**Table S1.** Continued

| <b>Carrot juice (CJ)</b>    |             |                                |                                                                       |                  |
|-----------------------------|-------------|--------------------------------|-----------------------------------------------------------------------|------------------|
|                             | <b>Gene</b> | <b>Fold Change</b>             | <b>Description</b>                                                    | <b>Accession</b> |
| <b>Maintenance</b>          | lp_2442     | 3.17                           | prophage P2a protein 15                                               | NC_004567.2      |
|                             | lp_0632     | 2.76                           | prophage P1 protein 9, phage Cro/CI family transcriptional regulator  | NC_004567.2      |
|                             | lp_0915     | 3.54                           | phage protein                                                         | NC_004567.2      |
|                             | lp_2445     | 2.38                           | prophage P2a protein 12                                               | NC_004567.2      |
|                             | lp_2446     | 2.42                           | prophage P2a protein 11                                               | NC_004567.2      |
|                             | lp_2448     | 2.74                           | prophage P2a protein 9, phage Cro/CI family transcriptional regulator | NC_004567.2      |
|                             | lp_2460     | 2.12                           | prophage P2b protein 21                                               | NC_004567.2      |
|                             | lp_2461     | 3.90                           | prophage P2b protein 20                                               | NC_004567.2      |
|                             | lp_2467     | 2.04                           | prophage P2b protein 14, terminase small subunit                      | NC_004567.2      |
|                             | lp_2474     | 2.03                           | prophage P2b protein 7, DNA replication                               | NC_004567.2      |
|                             | lp_3381     | 2.64                           | prophage P3 protein 9                                                 | NC_004567.2      |
|                             | lp_0661     | -5.69                          | prophage P1 protein 38, terminase large subunit TerL                  | NC_004567.2      |
|                             | lp_0663     | -3.90                          | prophage P1 protein 40, minor head protein                            | NC_004567.2      |
|                             | lp_0675     | -2.38                          | prophage P1 protein 52, endolysin                                     | NC_004567.2      |
|                             | lp_0676     | -2.43                          | prophage P1 protein 53, GDSL-like lipase/acylhydrolase family         | NC_004567.2      |
|                             | lp_0682     | -2.25                          | prophage P1 protein 59                                                | NC_004567.2      |
| lp_2399                     | -2.04       | prophage P2a protein 58, holin | NC_004567.2                                                           |                  |
| lp_2457                     | -2.51       | prophage P2b protein 24        | NC_004567.2                                                           |                  |
| <b>Pineapple juice (PJ)</b> |             |                                |                                                                       |                  |
|                             | <b>Gene</b> | <b>Fold Change</b>             | <b>Description</b>                                                    | <b>Accession</b> |
| <b>LE growth phase</b>      | lp_0643     | -2.37                          | prophage P1 protein 20                                                | NC_004567.2      |
|                             | lp_0644     | -10.32                         | prophage P1 protein 21                                                | NC_004567.2      |
|                             | lp_0646     | -2.22                          | prophage P1 protein 23                                                | NC_004567.2      |
|                             | lp_0656     | -6.97                          | prophage P1 protein 33, phage ArpU family transcriptional regulator   | NC_004567.2      |
|                             | lp_0661     | -5.78                          | prophage P1 protein 38, terminase large subunit TerL                  | NC_004567.2      |
|                             | lp_0662     | -2.75                          | prophage P1 protein 39, portal protein                                | NC_004567.2      |
|                             | lp_0663     | -2.68                          | prophage P1 protein 40, minor head protein                            | NC_004567.2      |

**Table S1.** Continued

| <b>Pineapple juice (PJ)</b> |             |                    |                                                                                   |                  |
|-----------------------------|-------------|--------------------|-----------------------------------------------------------------------------------|------------------|
|                             | <b>Gene</b> | <b>Fold Change</b> | <b>Description</b>                                                                | <b>Accession</b> |
|                             | lp_0681     | -2.88              | prophage P1 protein 58, lysin                                                     | NC_004567.2      |
|                             | lp_0682     | -2.22              | prophage P1 protein 59                                                            | NC_004567.2      |
|                             | lp_2399     | -2.39              | prophage P2a protein 58, holin                                                    | NC_004567.2      |
|                             | lp_2426     | -6.41              | prophage P2a protein 31; phage ArpU family transcriptional regulator              | NC_004567.2      |
|                             | lp_2433     | -4.26              | prophage P2a protein 24; endodeoxyribonuclease RusA-like                          | NC_004567.2      |
|                             | lp_2434     | -2.35              | prophage P2a protein 23                                                           | NC_004567.2      |
|                             | lp_2436     | -9.93              | prophage P2a protein 21                                                           | NC_004567.2      |
|                             | lp_2437     | -6.81              | prophage P2a protein 20, replication protein DnaD domain                          | NC_004567.2      |
| <b>LE growth phase</b>      | lp_2442     | -8.05              | prophage P2a protein 15                                                           | NC_004567.2      |
|                             | lp_2445     | -5.92              | prophage P2a protein 12                                                           | NC_004567.2      |
|                             | lp_2446     | -7.32              | prophage P2a protein 11                                                           | NC_004567.2      |
|                             | lp_2455     | -2.36              | prophage P2a protein 2, integrase                                                 | NC_004567.2      |
|                             | lp_2457     | -2.37              | prophage P2b protein 24                                                           | NC_004567.2      |
|                             | lp_2466     | -2.38              | prophage P2b protein 15, terminase large subunit                                  | NC_004567.2      |
|                             | lp_2472     | -2.53              | prophage P2b protein 9                                                            | NC_004567.2      |
|                             | lp_2473     | -2.36              | prophage P2b protein 8, helicase                                                  | NC_004567.2      |
|                             | lp_2480     | -2.34              | prophage P2b protein 1, integrase                                                 | NC_004567.2      |
|                             | lp_2397     | 2.37               | prophage P2a protein 59; extracellular polysaccharide deacetylase, lipid-anchored | NC_004567.2      |
|                             | lp_0915     | 2.80               | phage protein                                                                     | NC_004567.2      |
|                             | lp_0643     | -2.93              | prophage P1 protein 20                                                            | NC_004567.2      |
|                             | lp_0644     | -9.51              | prophage P1 protein 21                                                            | NC_004567.2      |
| <b>Maintenance</b>          | lp_0646     | -2.76              | prophage P1 protein 23                                                            | NC_004567.2      |
|                             | lp_0656     | -10.61             | prophage P1 protein 33, phage ArpU family transcriptional regulator               | NC_004567.2      |
|                             | lp_0661     | -3.76              | prophage P1 protein 38, terminase large subunit TerL                              | NC_004567.2      |
|                             | lp_0662     | -2.31              | prophage P1 protein 39, portal protein                                            | NC_004567.2      |
|                             | lp_0663     | -2.51              | prophage P1 protein 40, minor head protein                                        | NC_004567.2      |
|                             | lp_0681     | -3.43              | prophage P1 protein 58, lysin                                                     | NC_004567.2      |

176 **Table S1.** Continued

| <b>Pineapple juice (PJ)</b> |             |                    |                                                                      |                  |
|-----------------------------|-------------|--------------------|----------------------------------------------------------------------|------------------|
|                             | <b>Gene</b> | <b>Fold Change</b> | <b>Description</b>                                                   | <b>Accession</b> |
|                             | lp_0682     | -10.37             | prophage P1 protein 59                                               | NC_004567.2      |
|                             | lp_2399     | -2.67              | prophage P2a protein 58, holin                                       | NC_004567.2      |
|                             | lp_2417     | -2.62              | prophage P2a protein 40; major capsid protein                        | NC_004567.2      |
|                             | lp_2426     | -8.80              | prophage P2a protein 31; phage ArpU family transcriptional regulator | NC_004567.2      |
|                             | lp_2434     | -2.91              | prophage P2a protein 23                                              | NC_004567.2      |
| <b>Maintenance</b>          | lp_2436     | -10.91             | prophage P2a protein 21                                              | NC_004567.2      |
|                             | lp_2437     | -6.83              | prophage P2a protein 20, replication protein DnaD domain             | NC_004567.2      |
|                             | lp_2442     | -12.30             | prophage P2a protein 15                                              | NC_004567.2      |
|                             | lp_2445     | -14.63             | prophage P2a protein 12                                              | NC_004567.2      |
|                             | lp_2446     | -13.86             | prophage P2a protein 11                                              | NC_004567.2      |
|                             | lp_2457     | -5.12              | prophage P2b protein 24                                              | NC_004567.2      |

177

178

179

180

181

182

183

184

185

186

187 **Table S2.** Cell density (log CFU/ml) and pH values during the growth (24 h at 30°C) and the maintenance period (21 days at 4°C) in carrot juice (CJ),  
 188 pineapple juice (PJ), and MRS broth.

|            |            | Time (h) at 30°C |             |             |             |             |             |             |             |             |             |             |             | Time (days) at 4°C |             |             |             |             |
|------------|------------|------------------|-------------|-------------|-------------|-------------|-------------|-------------|-------------|-------------|-------------|-------------|-------------|--------------------|-------------|-------------|-------------|-------------|
|            |            | 0                | 2           | 4           | 6           | 8           | 10          | 12          | 14          | 16          | 18          | 20          | 22          | 24                 | 5           | 10          | 15          | 21          |
| <b>CJ</b>  | log CFU/ml | 7.04 ± 0.03      | 6.98 ± 0.04 | 7.44 ± 0.02 | 8.10 ± 0.05 | 8.45 ± 0.04 | 8.76 ± 0.02 | 8.97 ± 0.03 | 9.00 ± 0.06 | 9.10 ± 0.05 | 9.15 ± 0.03 | 9.16 ± 0.04 | 9.21 ± 0.06 | 9.20 ± 0.05        | 9.12 ± 0.04 | 9.02 ± 0.02 | 8.85 ± 0.05 | 8.68 ± 0.03 |
|            | pH         | 5.81 ± 0.02      | 5.75 ± 0.02 | 5.70 ± 0.02 | 5.61 ± 0.01 | 5.51 ± 0.02 | 5.21 ± 0.02 | 4.91 ± 0.03 | 4.50 ± 0.01 | 4.26 ± 0.01 | 4.24 ± 0.02 | 4.25 ± 0.03 | 4.23 ± 0.03 | 4.19 ± 0.02        | 4.10 ± 0.02 | 4.08 ± 0.01 | 4.06 ± 0.03 | 4.02 ± 0.02 |
| <b>PJ</b>  | log CFU/ml | 7.02 ± 0.03      | 6.98 ± 0.04 | 7.01 ± 0.02 | 7.16 ± 0.04 | 7.71 ± 0.04 | 8.28 ± 0.05 | 8.68 ± 0.04 | 8.91 ± 0.03 | 9.05 ± 0.03 | 9.08 ± 0.05 | 9.09 ± 0.06 | 9.11 ± 0.04 | 9.13 ± 0.06        | 8.83 ± 0.02 | 8.64 ± 0.04 | 8.51 ± 0.04 | 8.35 ± 0.03 |
|            | pH         | 3.69 ± 0.02      | 3.67 ± 0.01 | 3.66 ± 0.02 | 3.65 ± 0.01 | 3.58 ± 0.02 | 3.56 ± 0.03 | 3.47 ± 0.04 | 3.43 ± 0.02 | 3.40 ± 0.02 | 3.35 ± 0.02 | 3.34 ± 0.03 | 3.30 ± 0.02 | 3.29 ± 0.03        | 3.25 ± 0.02 | 3.24 ± 0.01 | 3.24 ± 0.01 | 3.22 ± 0.01 |
| <b>MRS</b> | log CFU/ml | 6.99 ± 0.03      | 7.10 ± 0.03 | 7.56 ± 0.02 | 8.35 ± 0.03 | 9.01 ± 0.04 | 9.40 ± 0.05 | 9.61 ± 0.04 | 9.70 ± 0.03 | 9.78 ± 0.05 | 9.84 ± 0.04 | 9.81 ± 0.04 | 9.84 ± 0.03 | 9.83 ± 0.08        | 9.71 ± 0.04 | 9.64 ± 0.05 | 9.15 ± 0.06 | 8.89 ± 0.05 |
|            | pH         | 5.71 ± 0.01      | 5.60 ± 0.02 | 5.55 ± 0.02 | 4.98 ± 0.03 | 4.44 ± 0.02 | 4.32 ± 0.02 | 4.18 ± 0.03 | 4.10 ± 0.02 | 4.02 ± 0.02 | 4.00 ± 0.01 | 4.01 ± 0.03 | 3.99 ± 0.02 | 3.98 ± 0.01        | 3.98 ± 0.02 | 3.97 ± 0.03 | 3.96 ± 0.04 | 3.96 ± 0.02 |

189 Each value was expressed as the mean of three independent experiments ± standard deviations analyzed in duplicate.

190  
191

192

193

194

195 **Table S3.** Concentrations (mM) of organic acids (lactic and malic acids) and carbohydrates (glucose, fructose, sucrose, galactose and lactose) during  
 196 the late exponential (LE) growth phase (16 or 18 h at 30°C) and the maintenance period (21 days at 4°C) in carrot (CJ) and pineapple (PJ) juices and  
 197 MRS medium. Concentrations before fermentation are also reported.

|                  | CJ                  |                     |                     | PJ                   |                      |                      | MRS                  |                      |                      |
|------------------|---------------------|---------------------|---------------------|----------------------|----------------------|----------------------|----------------------|----------------------|----------------------|
|                  | Unfermented         | LE growth phase     | Maintenance         | Unfermented          | LE growth phase      | Maintenance          | Unfermented          | LE growth phase      | Maintenance          |
| Lactic acid (mM) | n.d.                | 41 ± 1 <sup>d</sup> | 55 ± 2 <sup>c</sup> | n.d.                 | 38 ± 2 <sup>d</sup>  | 57 ± 4 <sup>c</sup>  | n.d.                 | 128 ± 5 <sup>b</sup> | 141 ± 8 <sup>a</sup> |
| Glucose (mM)     | 58 ± 2 <sup>c</sup> | 50 ± 2 <sup>d</sup> | 49 ± 2 <sup>d</sup> | 206 ± 5 <sup>a</sup> | 202 ± 4 <sup>a</sup> | 198 ± 6 <sup>a</sup> | 115 ± 4 <sup>b</sup> | 53 ± 2 <sup>d</sup>  | 46 ± 3 <sup>e</sup>  |
| Fructose (mM)    | 47 ± 1 <sup>a</sup> | 42 ± 1 <sup>b</sup> | 41 ± 2 <sup>b</sup> | 212 ± 7 <sup>a</sup> | 209 ± 3 <sup>a</sup> | 207 ± 4 <sup>a</sup> | n.d.                 | n.d.                 | n.d.                 |
| Sucrose (mM)     | 56 ± 2 <sup>a</sup> | 55 ± 2 <sup>a</sup> | 55 ± 3 <sup>a</sup> | 33 ± 2 <sup>b</sup>  | 29 ± 2 <sup>bc</sup> | 26 ± 2 <sup>c</sup>  | n.d.                 | n.d.                 | n.d.                 |
| Malic acid (mM)  | 29 ± 1 <sup>a</sup> | 18 ± 1 <sup>c</sup> | 13 ± 1 <sup>d</sup> | 21 ± 1 <sup>b</sup>  | 14 ± 2 <sup>d</sup>  | 10 ± 1 <sup>e</sup>  | n.d.                 | n.d.                 | n.d.                 |
| Citric acid (mM) | n.d.                | n.d.                | n.d.                | 20 ± 1 <sup>a</sup>  | 19 ± 1 <sup>a</sup>  | 19 ± 2 <sup>a</sup>  | n.d.                 | n.d.                 | n.d.                 |

198 Each value was expressed as the mean of three independent experiments ± standard deviations analyzed in duplicate.

199 Means within the row with different superscript letters (a-e) are significantly different ( $P < 0.05$ ).

200 n.d., not detected.

201

202

203 **Table S4.** Concentrations (mg l<sup>-1</sup>) of total and individual free amino acids (FAA) during the late exponential (LE) growth phase (16 or 18 h at 30°C)  
 204 and the maintenance period (21 days at 4°C) in carrot (CJ) and pineapple (PJ) juices and MRS medium. Concentrations before fermentation are also  
 205 reported.

| FAA<br>(mg/L) | CJ                     |                       |                        | PJ                    |                       |                        | MRS broth              |                        |                        |
|---------------|------------------------|-----------------------|------------------------|-----------------------|-----------------------|------------------------|------------------------|------------------------|------------------------|
|               | Unfermented            | LE growth<br>phase    | Maintenance            | Unfermented           | LE growth<br>phase    | Maintenance            | Unfermented            | LE growth<br>phase     | Maintenance            |
| Asp           | 228.12                 | 151.12                | 241.23                 | 83.01                 | 54.02                 | 221.38                 | 155.31                 | 58.71                  | 88.45                  |
| Thr           | 28.72                  | 16.13                 | 23.12                  | 11.13                 | 9.41                  | 26.41                  | 141.43                 | 123.22                 | 202.33                 |
| Ser           | 212.72                 | 161.13                | 211.90                 | 88.20                 | 88.23                 | 203.36                 | 209.22                 | 38.32                  | 61.71                  |
| Glu           | 50.59                  | 22.03                 | 17.21                  | 57.30                 | 27.12                 | 71.55                  | 446.18                 | 399.47                 | 559.23                 |
| Gly           | 7.61                   | 1.12                  | 1.81                   | 17.21                 | 15.61                 | 34.62                  | 270.56                 | 463.51                 | 620.34                 |
| Ala           | 172.13                 | 123.61                | 173.25                 | 55.72                 | 31.74                 | 92.38                  | 368.12                 | 367.63                 | 570.74                 |
| Cys           | 8.90                   | 6.96                  | 8.23                   | 12.30                 | 12.21                 | 34.53                  | 100.72                 | 102.31                 | 163.66                 |
| Val           | 40.23                  | 21.12                 | 29.15                  | 20.27                 | 22.24                 | 53.12                  | 196.19                 | 210.50                 | 327.38                 |
| Met           | 6.13                   | 2.46                  | 2.49                   | 18.21                 | 11.12                 | 28.41                  | 139.72                 | 122.24                 | 178.41                 |
| Ile           | 23.63                  | 7.31                  | 13.02                  | 13.71                 | 12.22                 | 27.66                  | 198.61                 | 136.31                 | 219.69                 |
| Leu           | 16.12                  | 5.13                  | 6.73                   | 11.36                 | 16.74                 | 39.02                  | 390.80                 | 323.12                 | 527.15                 |
| Tyr           | 15.12                  | 3.21                  | 5.03                   | 19.45                 | 13.22                 | 35.51                  | 94.36                  | 22.23                  | 40.12                  |
| Phe           | 26.13                  | 18.13                 | 22.13                  | 33.62                 | 26.15                 | 61.32                  | 273.61                 | 182.41                 | 308.36                 |
| His           | 9.12                   | 6.12                  | 7.03                   | 41.71                 | 32.41                 | 60.12                  | 184.60                 | 131.36                 | 225.81                 |
| Trp           | 7.21                   | 4.20                  | 6.02                   | 14.14                 | 11.12                 | 12.01                  | 20.22                  | 81.57                  | 47.38                  |
| Orn           | 1.32                   | 2.03                  | 2.31                   | 2.41                  | 1.41                  | 3.23                   | 12.56                  | 13.73                  | 28.50                  |
| Lys           | 9.12                   | 17.03                 | 25.01                  | 20.30                 | 14.85                 | 44.10                  | 180.38                 | 141.80                 | 222.03                 |
| Arg           | 35.21                  | 20.03                 | 36.96                  | 16.71                 | 17.20                 | 45.68                  | 299.12                 | 282.39                 | 436.43                 |
| Pro           | 13.73                  | 11.02                 | 16.92                  | 11.23                 | 13.81                 | 24.49                  | 84.71                  | 120.91                 | 124.67                 |
| GABA          | 183.12                 | 129.20                | 172.71                 | 26.13                 | 27.51                 | 58.21                  | 33.52                  | 83.20                  | 107.25                 |
| Total         | 1095 ± 37 <sup>e</sup> | 708 ± 63 <sup>f</sup> | 1022 ± 81 <sup>e</sup> | 574 ± 37 <sup>g</sup> | 458 ± 37 <sup>h</sup> | 1177 ± 43 <sup>d</sup> | 3800 ± 61 <sup>b</sup> | 3405 ± 72 <sup>c</sup> | 5060 ± 86 <sup>a</sup> |

206 Each value was expressed as the mean of three independent experiments ± standard deviations analyzed in duplicate.

207 Means within the row with different superscript letters (a-h) are significantly different ( $P < 0.05$ ).

208 **Table S5.** Comparison of microarray and qRT-PCR data for differentially expressed genes in  
 209 *Lactobacillus plantarum* C2 during the late exponential (LE) growth phase (16 or 18 h at 30°C) in  
 210 carrot (CJ) or pineapple (PJ) juices compared to MRS medium.

| <b>Carrot juice (CJ)</b>    |                               |                            |
|-----------------------------|-------------------------------|----------------------------|
| <b>Gene</b>                 | <b>Microarray fold change</b> | <b>qRT-PCR fold change</b> |
| <i>lp_3491</i>              | 7.67                          | 7.62                       |
| <i>hpk5</i>                 | 6.20                          | 2.99                       |
| <i>lp_2183</i>              | 3.49                          | 1.94                       |
| <i>lp_1425</i>              | 6.59                          | 1.7                        |
| <i>gadB</i>                 | -11.28                        | 0.76                       |
| <i>purF</i>                 | -3.29                         | 0.77                       |
| <i>pyrC</i>                 | -7.00                         | 0.63                       |
| <i>pyrB</i>                 | -8.62                         | 0.34                       |
| <i>aroC2</i>                | 12.30                         | 19.95                      |
| <i>aroI</i>                 | 2.14                          | 10.66                      |
| <b>Pineapple juice (PJ)</b> |                               |                            |
| <b>Gene</b>                 | <b>Microarray fold change</b> | <b>qRT-PCR fold change</b> |
| <i>fabI</i>                 | 2.92                          | 3.08                       |
| <i>fabD</i>                 | 2.66                          | 4.64                       |
| <i>fabz1</i>                | 3.23                          | 4.99                       |
| <i>hisX</i>                 | 2.11                          | 1.48                       |
| <i>hisD</i>                 | 2.04                          | 2.2                        |
| <i>atpG</i>                 | 2.07                          | 1.71                       |
| <i>atpA</i>                 | 2.12                          | 3.47                       |
| <i>pdhC</i>                 | -7.43                         | 0.13                       |
| <i>accA2</i>                | 2.74                          | 1.75                       |
| <i>accD2</i>                | 2.41                          | 5.64                       |
| <i>aroC2</i>                | 9.83                          | 15.63                      |
| <i>aroI</i>                 | 3.43                          | 12.01                      |
| <i>aroF</i>                 | 4.59                          | 2.42                       |
| <i>oppA</i>                 | 3.81                          | 12.40                      |
| <i>oppD</i>                 | 4.49                          | 3.17                       |
| <i>ileT</i>                 | 2.47                          | 1.86                       |
| <i>bcap</i>                 | 3.66                          | 3.27                       |
| <i>lp_1425</i>              | 4.52                          | 1.80                       |
| <i>lp_3491</i>              | 9.10                          | 11.59                      |
| <i>dltX</i>                 | 4.84                          | 1.64                       |
| <i>pyrB</i>                 | -2.05                         | 0.53                       |

211

212

213

214

215

216



| Target gene    |                | Sequence 5'→3'             |
|----------------|----------------|----------------------------|
| 16S rRNA       | Forward primer | GCGGTAATACGTAGGTGG         |
|                | Reverse primer | TCCTCTTCTGCACTCAAGT        |
| <i>recA</i>    | Forward primer | ACGGCGGGCAGAACAGATCAA      |
|                | Reverse primer | TCGGCACGCTTAAATGGCGGT      |
| <i>accA2</i>   | Forward primer | CGGGTGCCTATCCGGGTGTT       |
|                | Reverse primer | TGCCACCTTCACCAACAATCAAACCT |
| <i>accD2</i>   | Forward primer | TATGGGTTTCGCTTGCTGCTTG     |
|                | Reverse primer | ACTGACGGGCGCACTTAGGTC      |
| <i>dltX</i>    | Forward primer | CCAAGGCGAGCATGACAGCAAAG    |
|                | Reverse primer | AGTGGAGGAGGTGATGGCATGTT    |
| <i>fabI</i>    | Forward primer | TCAAAACGTTGGCGGTAACGGG     |
|                | Reverse primer | CAGCCACGTTGCCGATCTCAC      |
| <i>fabD</i>    | Forward primer | AGCAGCGAGTGAGGCGTTGG       |
|                | Reverse primer | CCTGGCTAAAGGGGGTACCGG      |
| <i>hisD</i>    | Forward primer | TCCTAAGAAGACCGACCCGGCA     |
|                | Reverse primer | ACGGTGGCACCAGAACACTTGG     |
| <i>hisX</i>    | Forward primer | GGCCGTAAGACCAAGGTGCGA      |
|                | Reverse primer | TCGCGCCAATTGCAACGCC        |
| <i>atpG</i>    | Forward primer | TCGCGGTTGACGACGAAGCA       |
|                | Reverse primer | GTCGGCCGTGTTGCCACAAT       |
| <i>atpA</i>    | Forward primer | CCGCCACCCAATTCATCGCTC      |
|                | Reverse primer | CGTCGTCTCCAGGTCGTGAA       |
| <i>pdhC</i>    | Forward primer | TTGGGCCGTTGCACCATCAATC     |
|                | Reverse primer | GGTGTGGGCGTATCGGTAAGGAA    |
| <i>aroI</i>    | Forward primer | ACATGCAACACATTCGTGGTAAGGA  |
|                | Reverse primer | GTTCCGCAATCTGCATCCCA       |
| <i>aroF</i>    | Forward primer | CGCTCTACGCTTGCAATTTGGCT    |
|                | Reverse primer | AAGGCCGCCATGAAGCCGAT       |
| <i>aroC2</i>   | Forward primer | AGACCGCTTCGACCGCTAACT      |
|                | Reverse primer | TCGTGAGGTCAGAGTGATGATTGGG  |
| <i>oppA</i>    | Forward primer | TCGTCAATGGCAAGAAGCCCGT     |
|                | Reverse primer | GCCCATCAGCTTGTCAAAGTAAGCA  |
| <i>oppD</i>    | Forward primer | ACATGCAACACATTCGTGGTAAGGA  |
|                | Reverse primer | GGTCCGCAATCTGCATCCCA       |
| <i>Bcap</i>    | Forward primer | AACGGTCGCAACGGCTAGGA       |
|                | Reverse primer | TCGCCGGTTCGCGTATTCA        |
| <i>ileT</i>    | Forward primer | GCCCCAGCTGGCTTCTTCTCA      |
|                | Reverse primer | AAAGGCGACCCCGCCGTTATC      |
| <i>lp_1425</i> | Forward primer | GTGGTCAACGGACTGATTTGAACGG  |
|                | Reverse primer | CCACTTGACTGAATCCAGGGCGT    |
| <i>lp_3491</i> | Forward primer | GGCACTCTTCAAGGCAGCTGGAAT   |
|                | Reverse primer | GGATCGGGAACCGGCAAGTGT      |
| <i>fabz1</i>   | Forward primer | GGGTGAATCGATCGTGGTGACGAAA  |
|                | Reverse primer | CGGCTTGCGCCAAAGCTTCAAT     |
| <i>pyrB</i>    | Forward primer | GTCACGGCCATACCATTCTTTGGGG  |
|                | Reverse primer | CCATTCACGTGTGGCCCGTTC      |
| <i>pyrC</i>    | Forward primer | TGCCATAAACGGGCAACCGA       |
|                | Reverse primer | TGGGGGCACCGGTGATCTA        |
| <i>purF</i>    | Forward primer | CGATCCGCCGACTGGTGGTA       |
|                | Reverse primer | TTGCGAGAACAGGGGGTTCGG      |
| <i>hpk5</i>    | Forward primer | AGTGATGCTGAATTAGTTGGGCGGG  |
|                | Reverse primer | CGCCAAATTATCAGTGACCTGGGTG  |
| <i>lp_2183</i> | Forward primer | GGGTGACGTGTAGAATTGGGCGA    |
|                | Reverse primer | GTGAGACCATGGACCAGGCGG      |
| <i>gadB</i>    | Forward primer | AGCCGCACTCGATAAGGTCGT      |
|                | Reverse primer | AGCCAACCGGAAGTCCCAGA       |
